# Supplementary material for: An immunomodulating peptide with potential to suppress tumour growth and autoimmunity
Source: PubMed Central journal article supplement (PMC10643673; doi:10.1038/s41598-023-47229-y), 2023-11-13
Supplement: 41598_2023_47229_MOESM1_ESM.pdf [file 41598_2023_47229_MOESM1_ESM.pdf]

# An immunomodulating peptide with potential to suppress tumour growth and autoimmunity

Michael Agrez<sup>1,4\*</sup>, Christopher Chandler<sup>2</sup>, Kristofer J. Thurecht<sup>3,4</sup>, Nicholas L. Fletcher<sup>3,4</sup>, Feifei Liu<sup>3,4</sup>, Gayathri Subramaniam<sup>3,4</sup>, Christopher B. Howard<sup>3,4</sup>, Benjamin Blyth<sup>5</sup>, Stephen Parker<sup>1</sup>, Darryl Turner<sup>6</sup>, Justyna Rzepecka<sup>6</sup>, Gavin Knox<sup>6</sup>, Anastasia Nika<sup>6</sup>, Andrew M. Hall<sup>6</sup>, Hayley Gooding<sup>6</sup> & Laura Gallagher<sup>6</sup>

<sup>1</sup>InterK Peptide Therapeutics Limited, New South Wales, Australia. <sup>2</sup>Auspep Pty Limited, Melbourne, Australia. <sup>3</sup>Centre for Advanced Imaging, University of Queensland, Australia. <sup>4</sup>Australian Institute for Bioengineering and Nanotechnology and the ARC Training Centre for Innovation in Biomedical Imaging Technologies, University of Queensland, Australia. <sup>5</sup>Peter MacCallum Cancer Centre and Sir Peter MacCallum Department of Oncology at the University of Melbourne, Melbourne, Australia. <sup>6</sup>Concept Life Sciences, Edinburgh, Scotland.

## Supplementary information Flow cytometry data

**Figure S1:** Refers to manuscript **Figure 1d and 1e**  
CD25 and Ki67 (Splenocyte-derived exhausted CD4+ T cells)

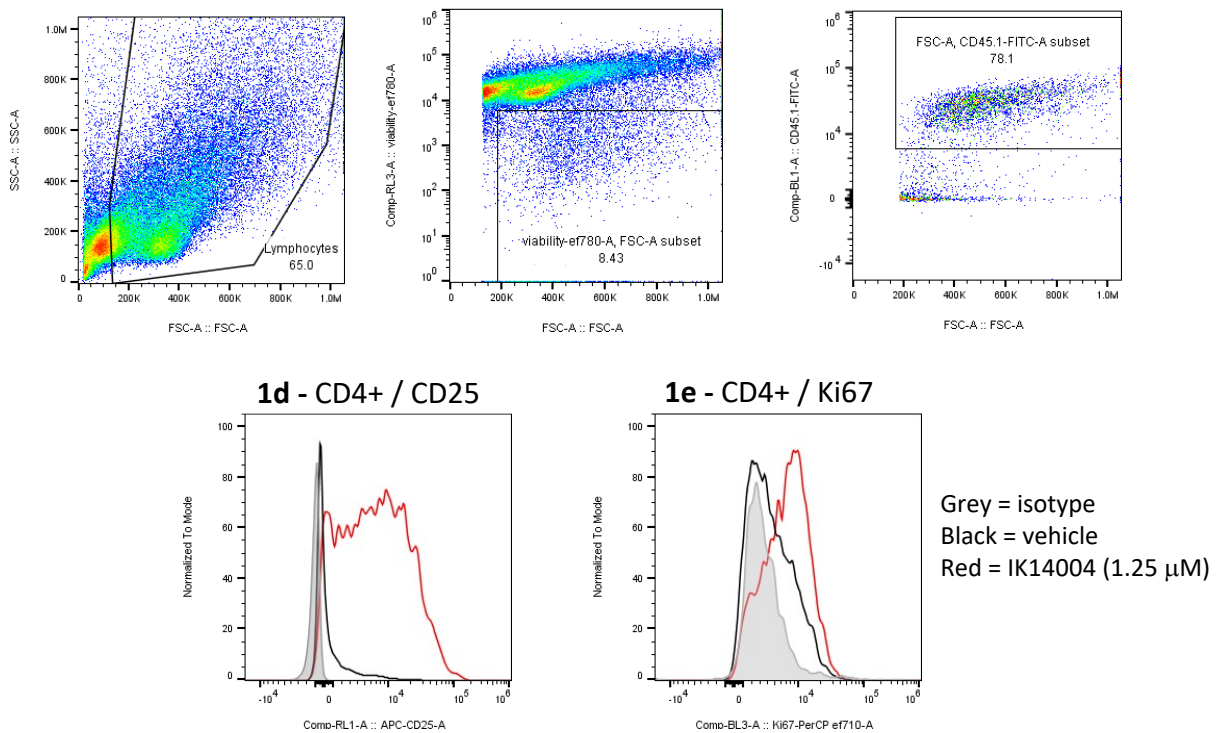

The Figure shows an exemplar gating strategy from Donor 1. Debris were excluded, then viable (live) and CD45.1+ cells (Tg4 exhausted CD4+ T cells) selected for analysis of CD25 (1d) or Ki67 (1e).

**Figure S2: Refers to manuscript Figure 2e – 2k**

CD25, IL-12R $\beta$ 1 and IL-12R $\beta$ 2 (Splenocytes derived from the LLC xenograft model CD4+ T cells)

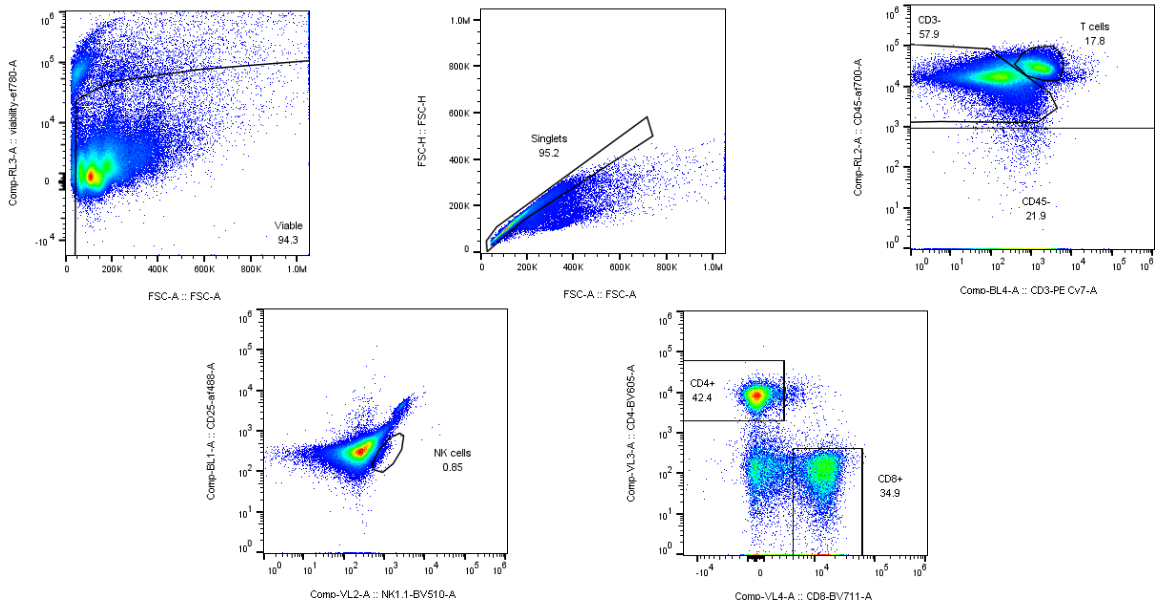

The Figure shows an exemplar gating strategy from mouse 2.0 (IK14004). Viable (live) cells selected, doublets excluded, CD45<sup>+</sup>CD3<sup>-</sup> and CD45<sup>+</sup>CD3<sup>+</sup> cell populations selected. Within CD3<sup>-</sup> cells, NK1.1<sup>+</sup> cells were selected and within CD3<sup>+</sup> cells, CD4<sup>+</sup> and CD8<sup>+</sup> cell populations gated.

**Viability**

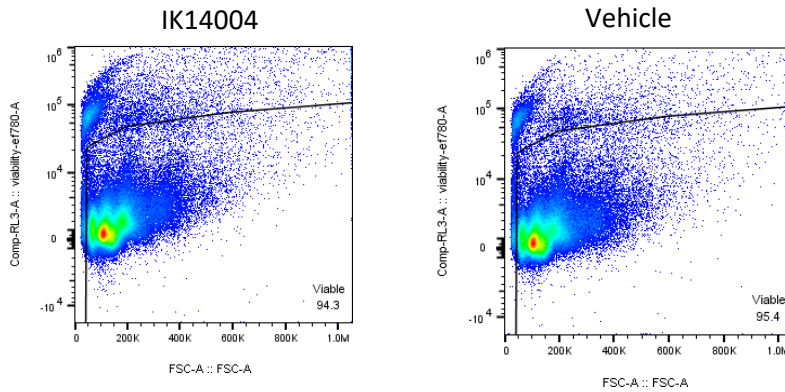

**Figure S2: Refers to manuscript Figure 2e – 2k (continued)**

CD25, IL-12R $\beta$ 1 and IL-12R $\beta$ 2 (Splenocytes derived from the LLC xenograft model CD4<sup>+</sup> T cells)

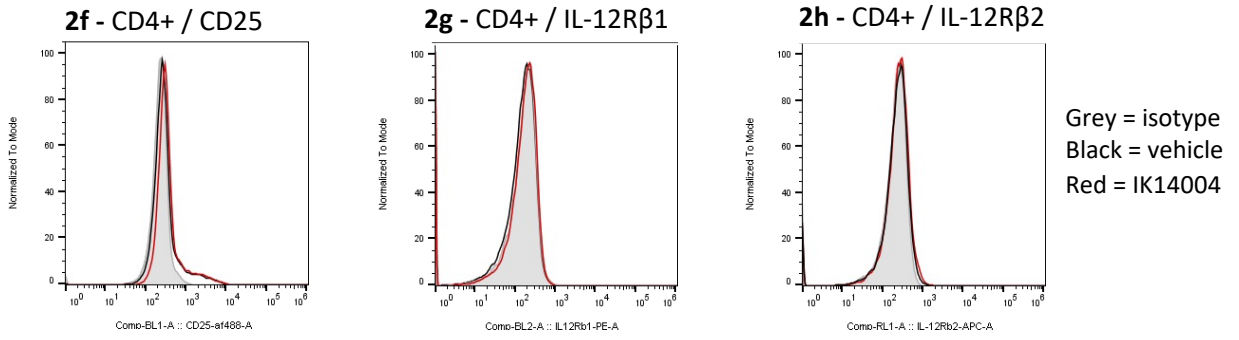

Analysis of CD25, IL-12R $\beta$ 1 and IL-12R $\beta$ 2 in CD4<sup>+</sup> T cells.

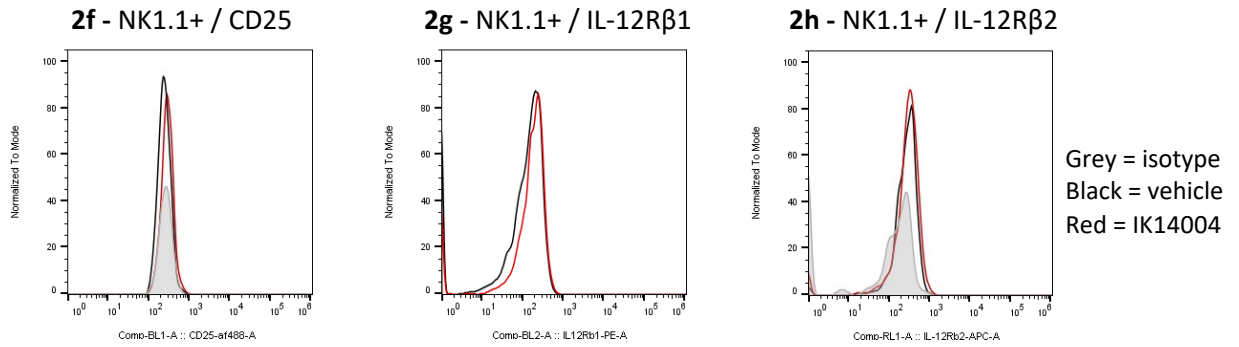

Analysis of CD25, IL-12R $\beta$ 1 and IL-12R $\beta$ 2 in NK1.1<sup>+</sup> cells.

**Figure S3:** Refers to manuscript **Figure 2m**  
 CD28 (Splenocytes derived from the LLC xenograft model CD4+ T cells)

Non-stimulated splenocytes

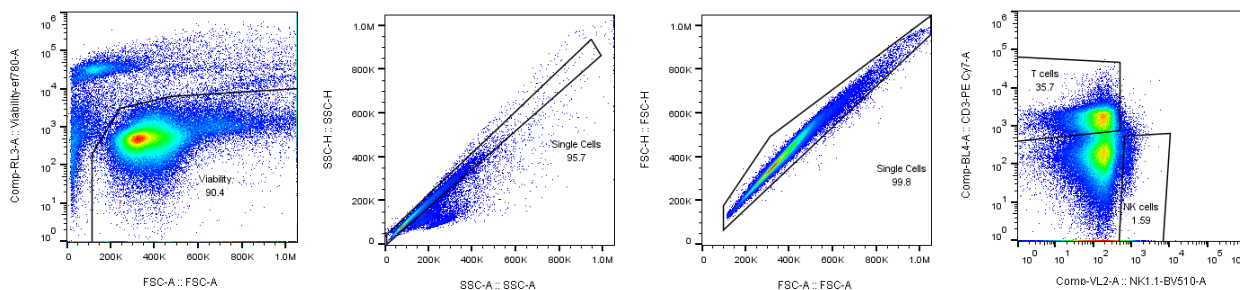

**2m - CD4+ / CD28**

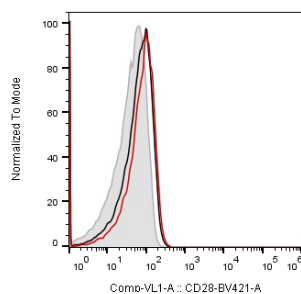

Grey = isotype  
 Black = vehicle  
 Red = IK14004

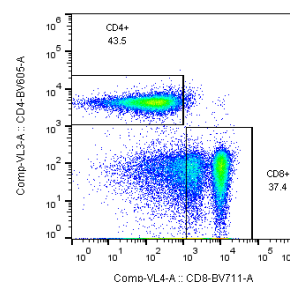

The Figure shows an exemplar gating strategy from mouse 2.0 (IK14004). Viable (live) cells selected, doublets excluded, CD3<sup>+</sup> T cell and CD3<sup>+</sup>NK1.1<sup>+</sup> NK cell populations selected. Within CD3<sup>+</sup> cells, CD4<sup>+</sup> selected for analysis of CD28.

**Figure S4:** Refers to manuscript **Figure 2n, 2q and 2r**

Viability, IL-12R $\beta$ 1 and IL-12R $\beta$ 2 (Cultured splenocytes derived from the LLC xenograft model CD4+ T cells)

Viability: cultured splenocytes

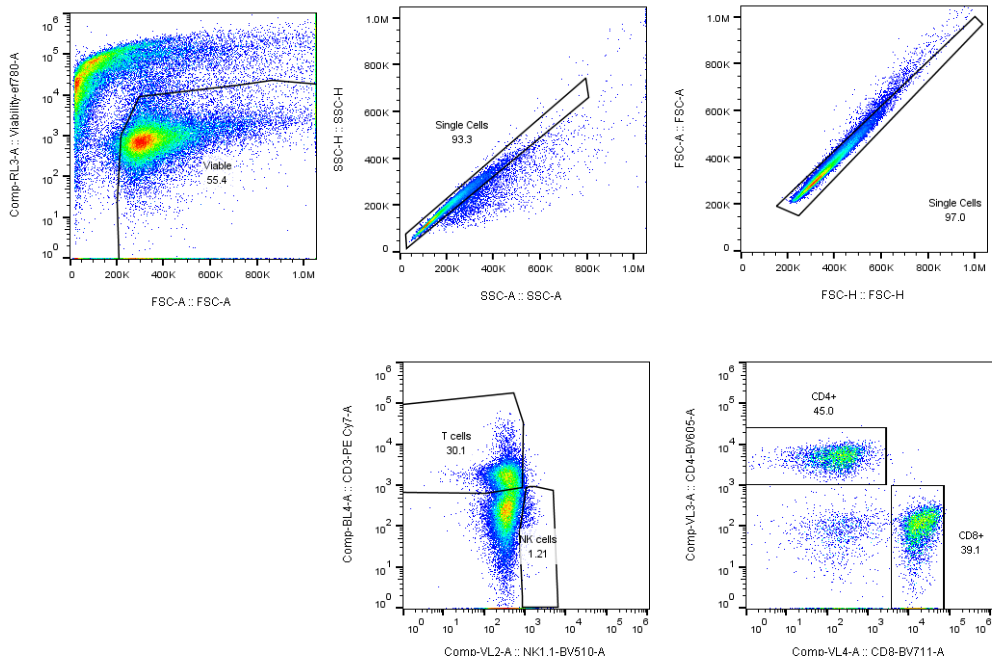

**2n - Viability**

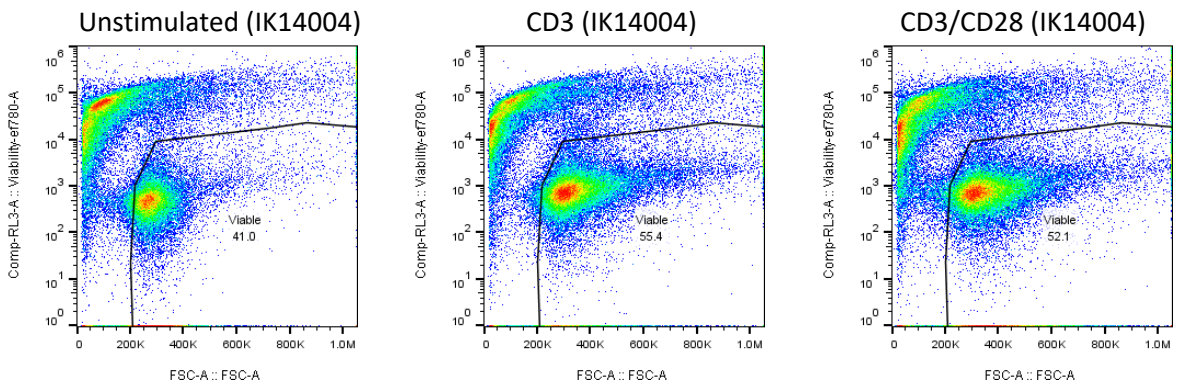

**Figure S4:** Refers to manuscript **Figure 2n, 2q and 2r (continued)**

IL-12R $\beta$ 1 and IL-12R $\beta$ 2 (Cultured splenocytes derived from the LLC xenograft model CD4<sup>+</sup> T cells)

**2q - CD4<sup>+</sup> / IL-12R $\beta$ 1**

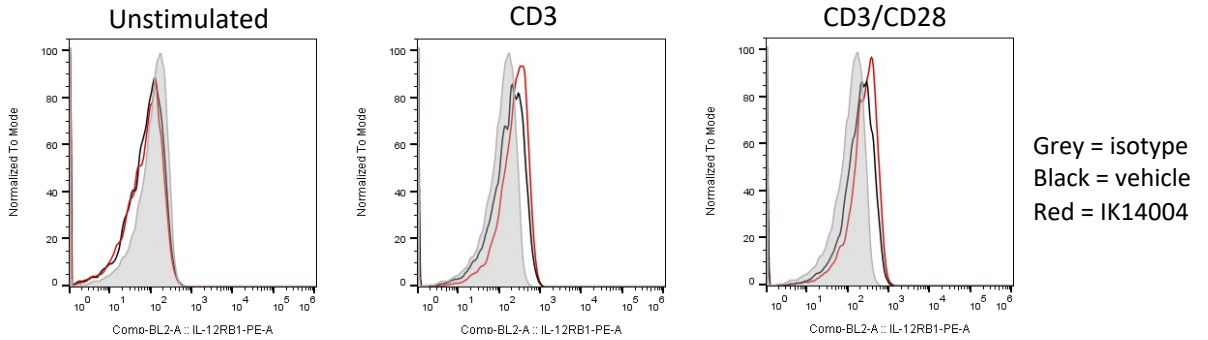

**2r - CD4<sup>+</sup> / IL-12R $\beta$ 2**

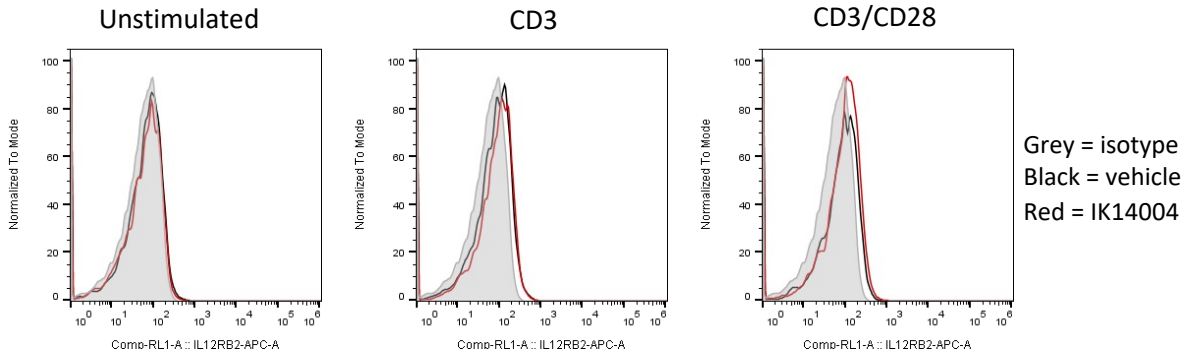

The Figure shows an exemplar gating strategy from anti-CD3 stimulated mouse 2.0 (IK14004). Viable (live) cells selected, doublets excluded, CD3<sup>+</sup> T cell and CD3<sup>+</sup>NK1.1<sup>+</sup> NK cell populations selected. Within CD3<sup>+</sup> cells, CD4<sup>+</sup> selected for analysis of IL-12R $\beta$ 1 and IL-12R $\beta$ 2.

**Figure S5:** Refers to manuscript **Figure 3a and 3e**  
 Ki67 and CD25 (Unstimulated human PBMC cultures)

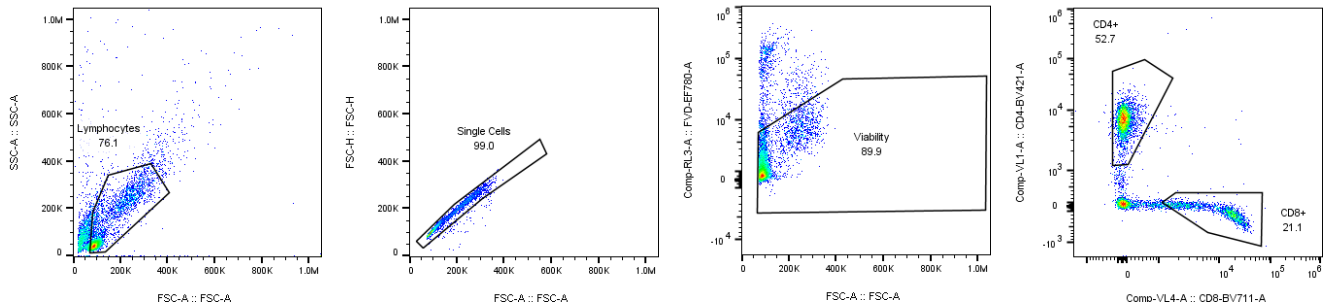

**3a - CD4+ / Ki67**

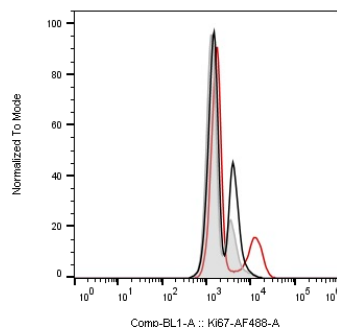

Grey = isotype  
 Black = vehicle  
 Red = IK14004 1.25  $\mu$ M

**3e - CD4+ / CD25**

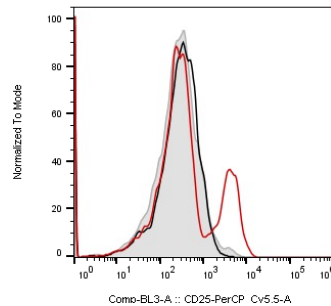

Grey = isotype  
 Black = vehicle  
 Red = IK14004 1.25  $\mu$ M

The Figure shows an exemplar gating strategy from Donor 3 unstimulated PBMCs (IK14004 1.25  $\mu$ M). Cells gated to remove debris, doublet cell exclusion, and viable (live) cells selected. Within viable cells, CD4<sup>+</sup> T cell selected for analysis of Ki67 and CD25.

**Figure S6:** Refers to manuscript **Figure 3j and 3k**  
**CD4+/CD8+ - TCR $\alpha/\beta$**  (Unstimulated/stimulated human PBMC cultures)

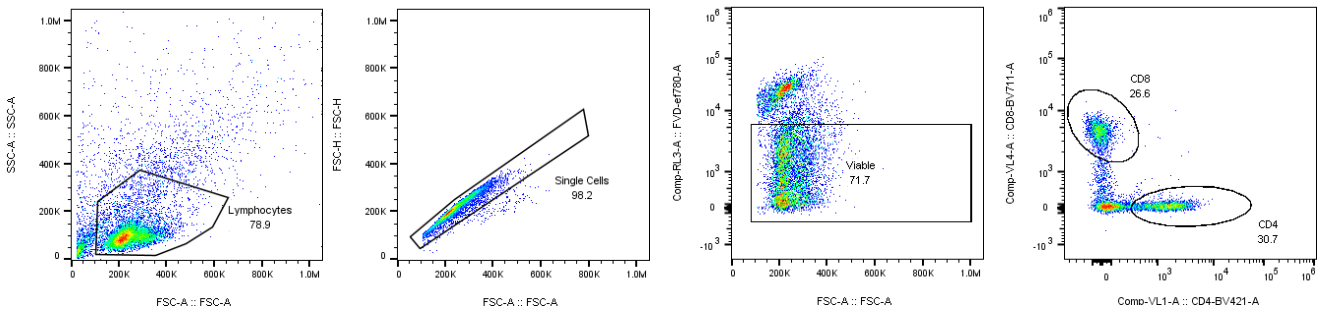

**3j - CD4+ / TCR $\alpha/\beta$**

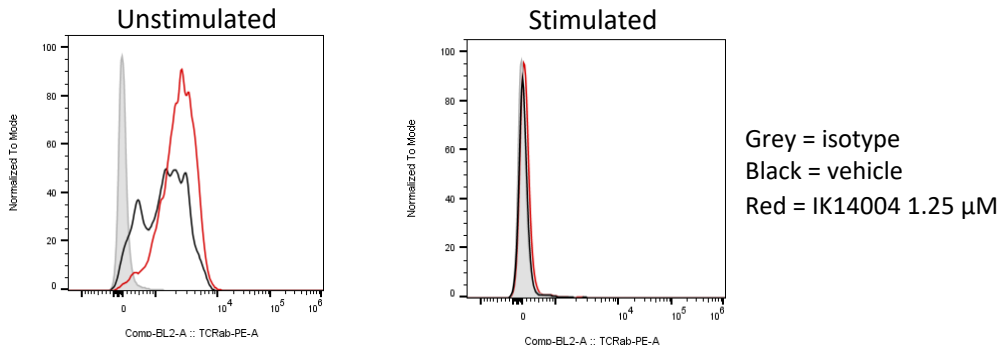

**3k - CD8+ / TCR $\alpha/\beta$**

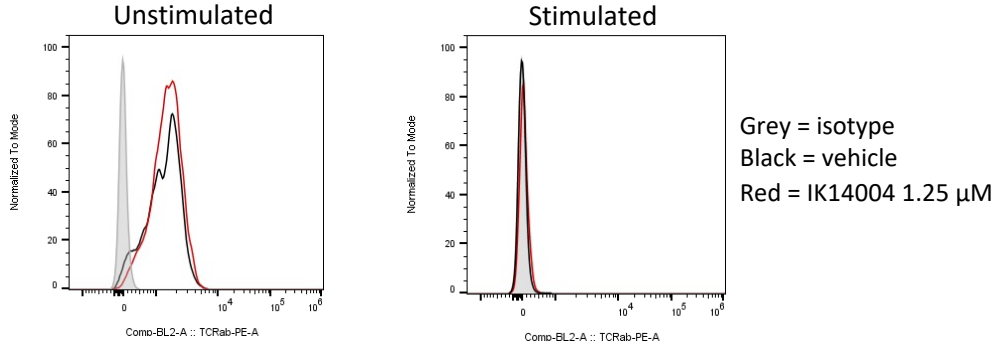

The Figure shows an exemplar gating strategy from Donor 1 unstimulated PBMCs (IK14004 1.25  $\mu$ M). Cells gated to remove debris, doublet cell exclusion and viable (live) cells selected. Within viable cells, CD4+ and CD8+ T cells selected for analysis of TCR $\alpha/\beta$ .



**Figure S7:** Refers to manuscript **Figure 4a – 4f**

Ki67, IL-12R $\beta$ 1 and IL-12R $\beta$ 2 (Stimulated human PBMC cultures: CD4+/CD8+ T cells)

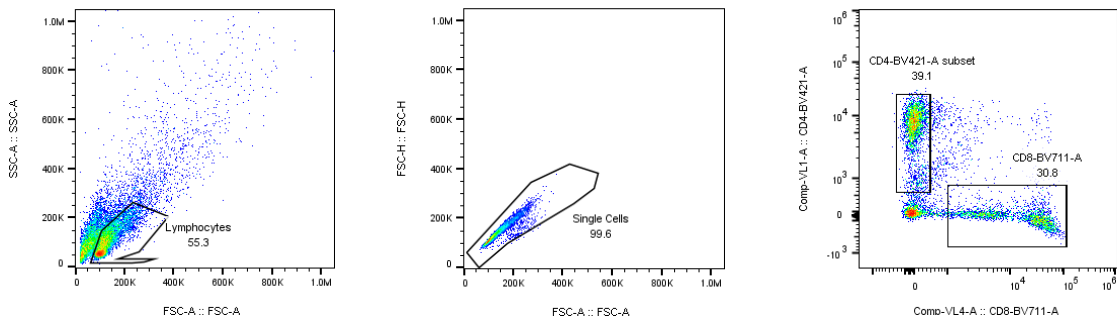

The Figure shows an exemplar gating strategy from Donor 2 stimulated PBMCs (IK14004 1.25  $\mu$ M). Cells gated to remove debris, doublet cell exclusion and CD4+ and CD8+ T cells selected for analysis of Ki67, IL-12R $\beta$ 1 and IL-12R $\beta$ 2.

**4a - CD4+ / Ki67**

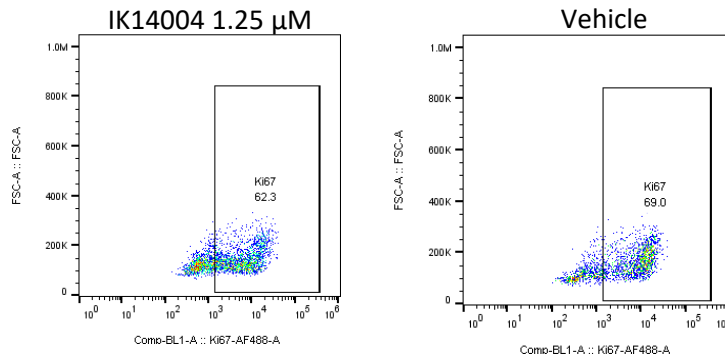

**4b - CD4+ / IL-12R $\beta$ 1**

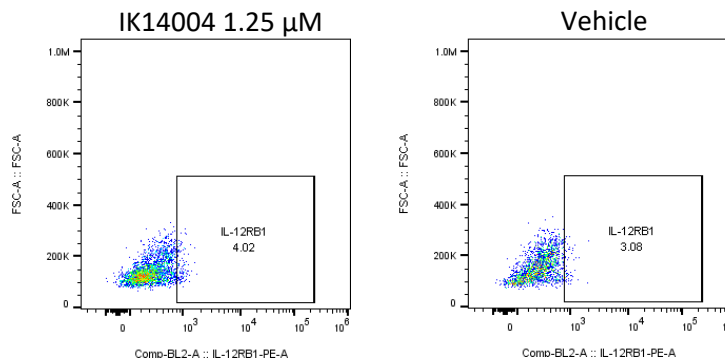

**4c - CD4+ / IL-12R $\beta$ 2**

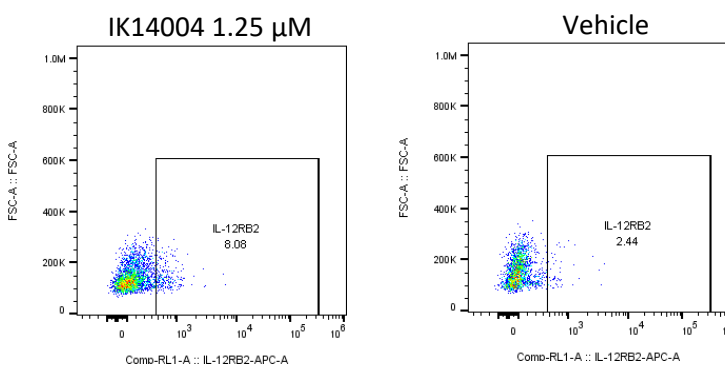

**Figure S7: Refers to manuscript Figure 4a – 4f (continued)**

Ki67, IL-12Rβ1 and IL-12Rβ2 (Human PBMC cultures: CD4+/CD8+ T cells)

**4d - CD8+ / Ki67**

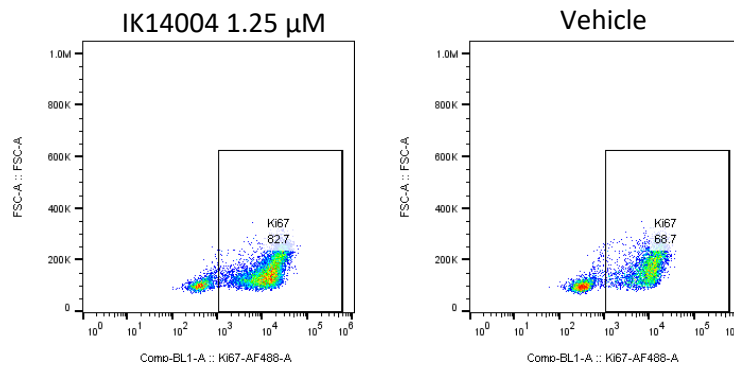

**4e - CD8+ / IL-12Rβ1**

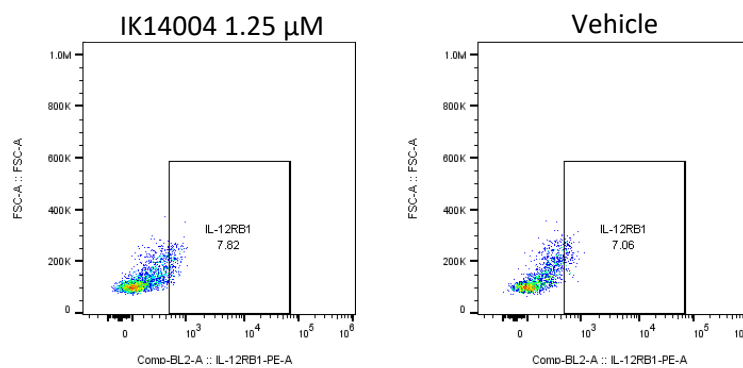

**4f - CD8+ / IL-12Rβ2**

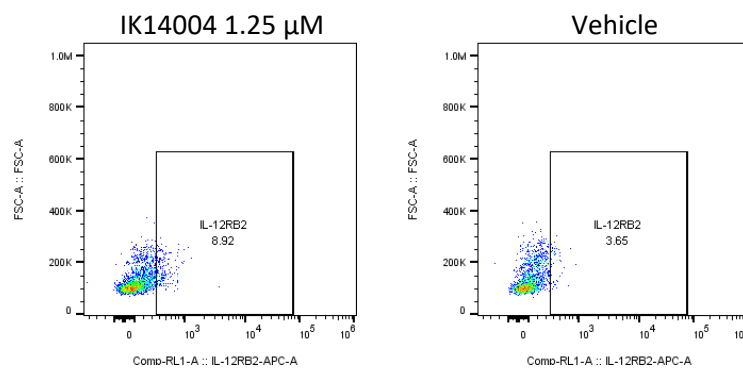

Cells gated to remove debris, doublet cell exclusion and CD4<sup>+</sup> and CD8<sup>+</sup> T cells selected for analysis of Ki67, IL-12Rβ1 and IL-12Rβ2 (Donor 2 and 3).

**Figure S8: Refers to manuscript Figure 4g – 4j**

IL-12Rβ1 and IL-12Rβ2 (Unstimulated human PBMC cultures: CD4+/CD8+ T cells)

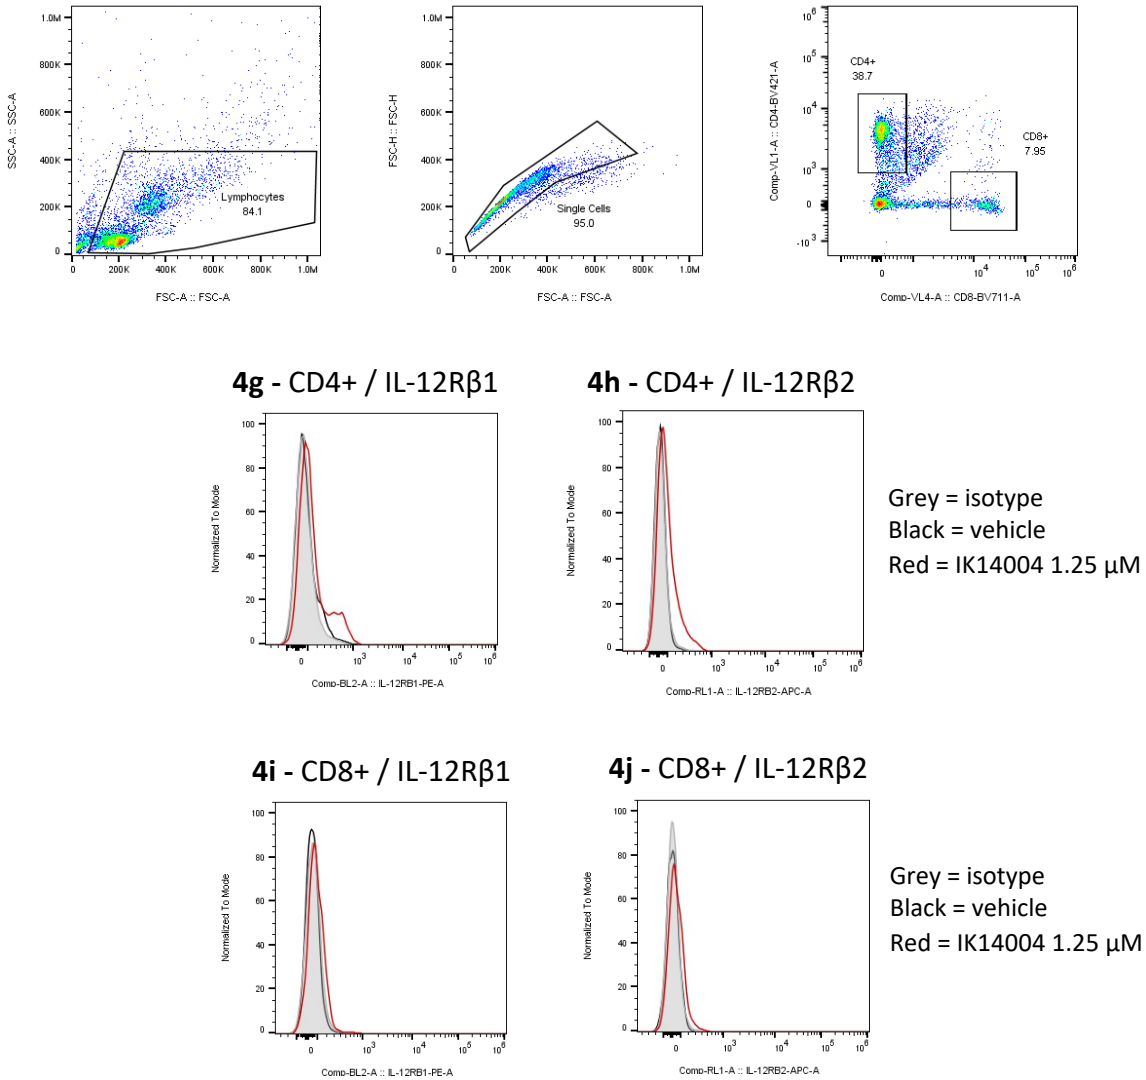

The Figure shows an exemplar gating strategy from Donor 1 unstimulated PBMCs (IK14004 1.25 μM). Cells gated to remove debris, doublet cell exclusion and CD4<sup>+</sup> and CD8<sup>+</sup> T cells selected for analysis of IL-12Rβ1 and IL-12Rβ2.

**Figure S9:** Refers to manuscript **Figure 5a - 5d**  
**IFN- $\alpha$  and IFN- $\beta$**  (Stimulated human PBMC cultures: CD4+/CD8+ T cells)

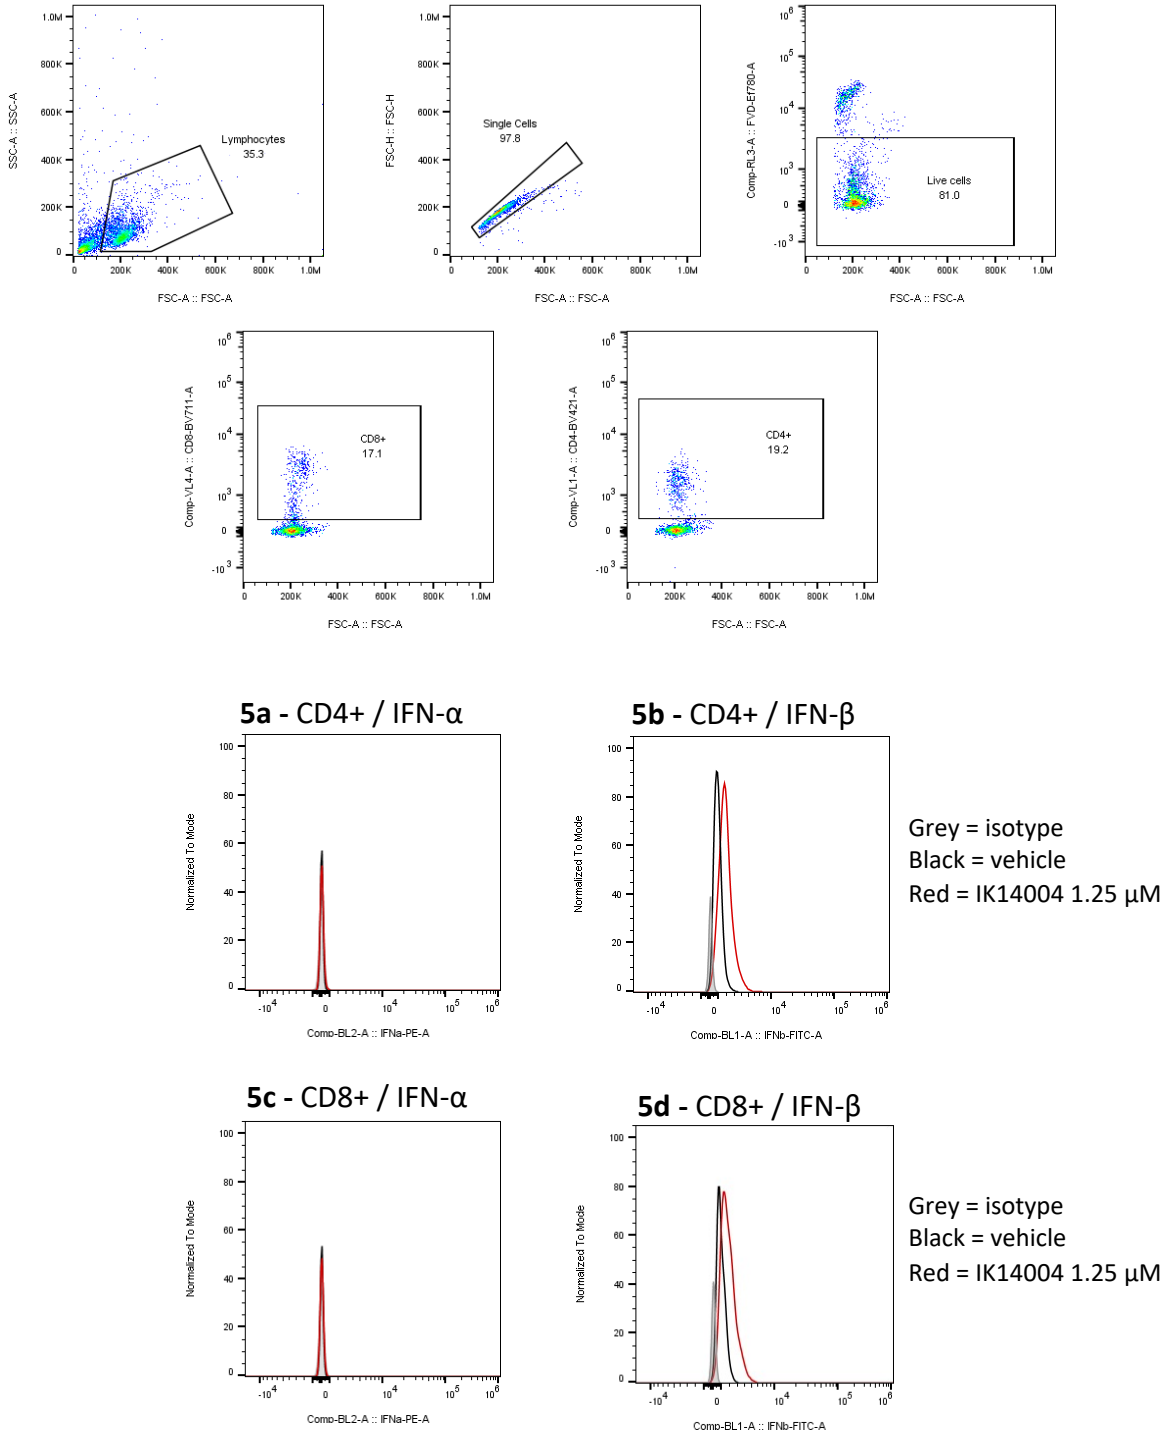

The Figure shows an exemplar gating strategy from Donor 2 stimulated PBMCs (IK14004 1.25  $\mu$ M). Cells gated to remove debris, doublet cell exclusion, viable cells gated and CD4+ and CD8+ T cells selected for analysis of IFN- $\alpha$  and IFN- $\beta$ .

**Figure S10:** Refers to manuscript **Figure 5e and 5f**  
 pSTAT4 (Isolated, stimulated human CD3+ T cells)

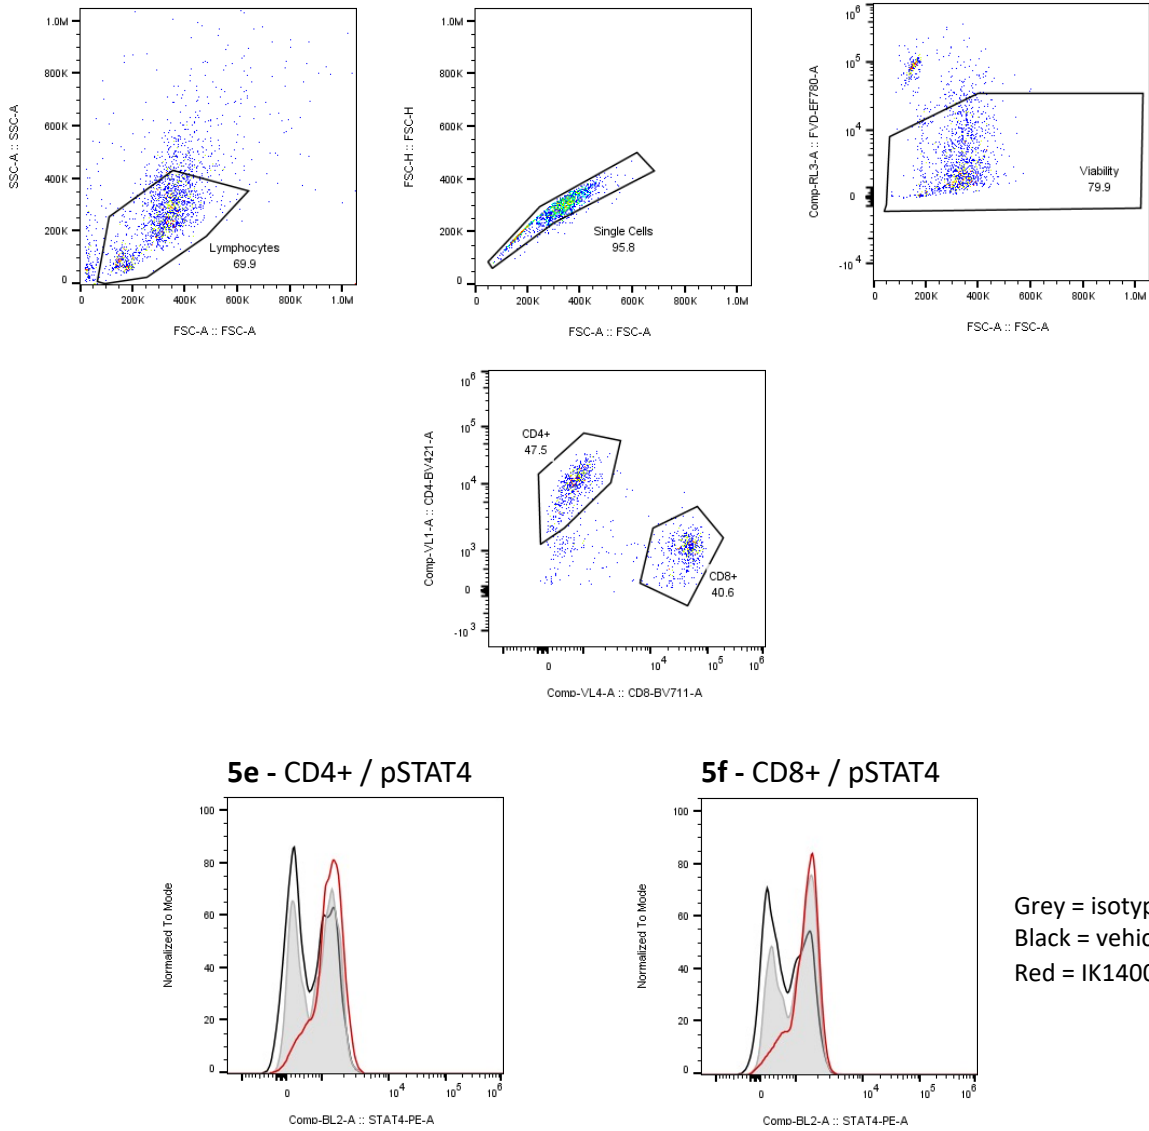

The Figure shows an exemplar gating strategy from Donor 1 stimulated CD3+ T cells (IK14004 1.25  $\mu$ M). Cells gated to remove debris, doublet cell exclusion, viable cells gated and CD4+ and CD8+ T cells selected for analysis of pSTAT4.

**Figure S11:** Refers to manuscript **Figure 5g and 5h**  
 pSTAT4 (Stimulated human PBMC cultures: CD4+/CD8+ T cells)

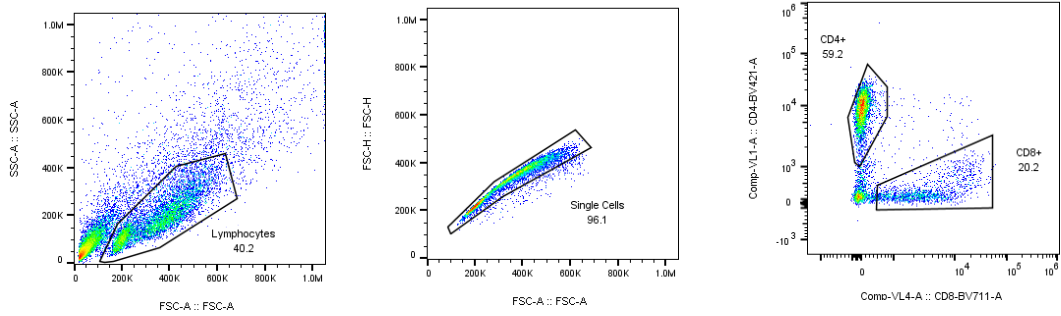

**5g - CD4+ / pSTAT4**

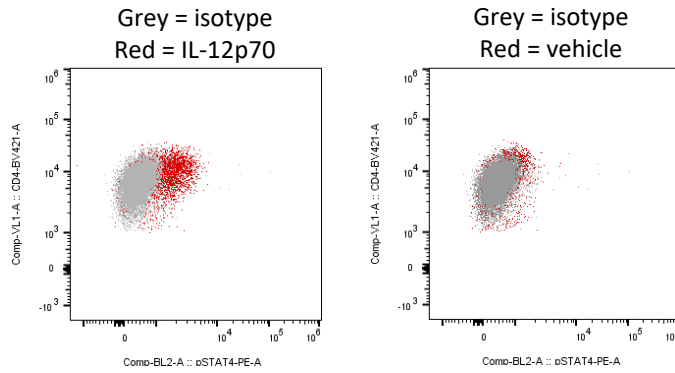

**5h - CD8+ / pSTAT4**

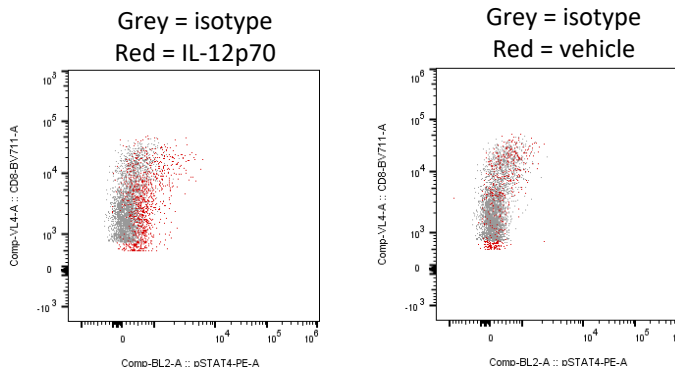

The Figure shows an exemplar gating strategy from Donor 1 stimulated PBMC (IL-12p70). Cells gated to remove debris, doublet cell exclusion, and CD4<sup>+</sup> and CD8<sup>+</sup> T cells selected for analysis of pSTAT4.

**Figure S12:** Refers to manuscript **Figure 6a - 6c**

Ki67, IL-12R $\beta$ 1 and IL-12R $\beta$ 2 (Stimulated human PBMC cultures: CD3-CD56<sup>dim</sup> NK cells)

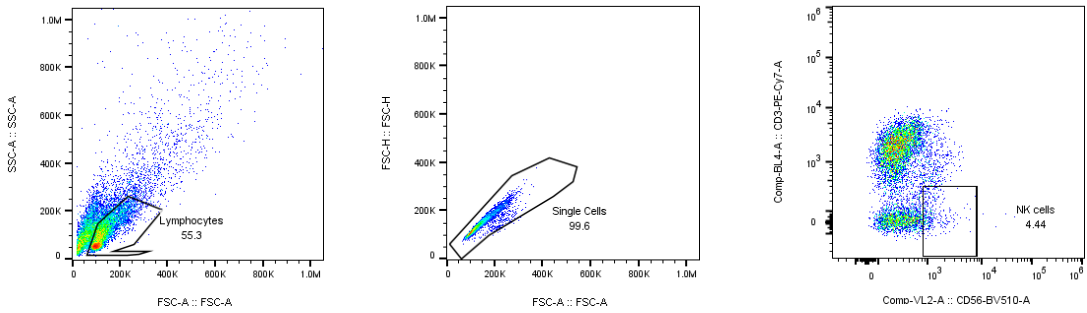

**6a -** CD3-CD56<sup>dim</sup> / Ki67

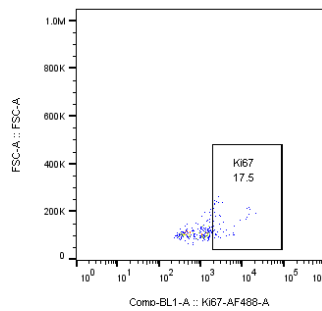

**6b -** CD3-CD56<sup>dim</sup> / IL-12R $\beta$ 1

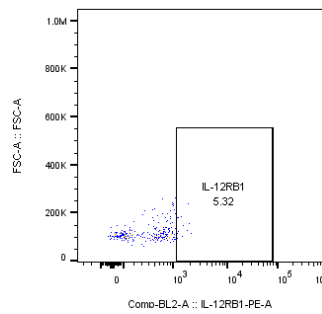

**6c -** CD3-CD56<sup>dim</sup> / IL-12R $\beta$ 2

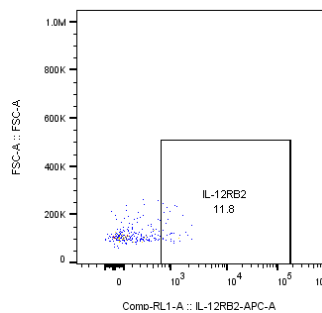

The Figure shows an exemplar gating strategy from Donor 3 stimulated PBMC (IK14004 1.25  $\mu$ M). Cells gated to remove debris, doublet cell exclusion, and CD3-CD56<sup>dim</sup> NK cells selected for analysis of Ki67, IL-12R $\beta$ 1 and IL-12R $\beta$ 2 (IK14004 1.25  $\mu$ M).

**Figure S13:** Refers to manuscript **Figure 6d and 6e**

IL-12Rβ1 and IL-12Rβ2 (Unstimulated human PBMC cultures: CD3-CD56+<sup>dim</sup> NK cells)

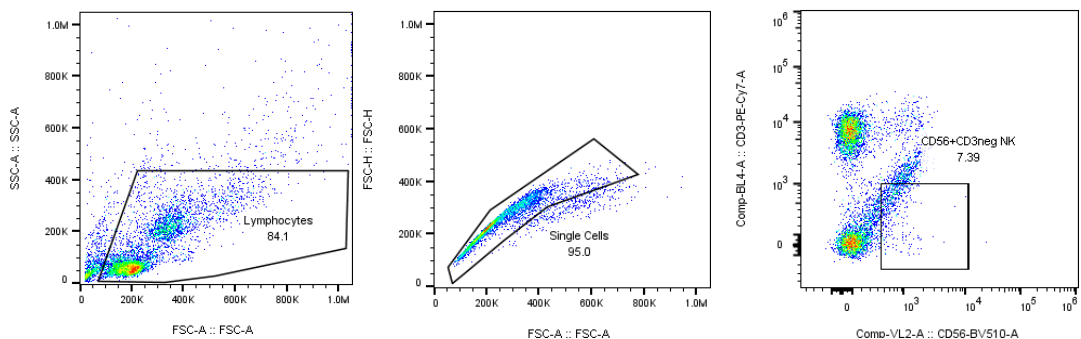

**6d - CD3-CD56+<sup>dim</sup> / IL-12Rβ1**

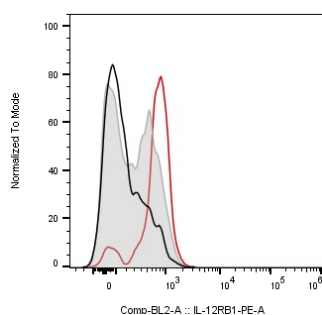

Grey = isotype  
 Black = vehicle  
 Red = IK14004 1.25 μM

**6e - CD3-CD56+<sup>dim</sup> / IL-12Rβ2**

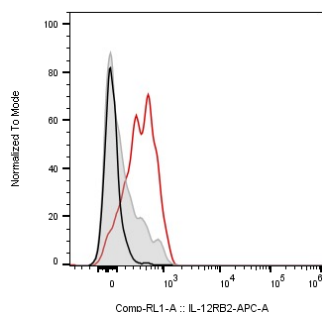

Grey = isotype  
 Black = vehicle  
 Red = IK14004 1.25 μM

The Figure shows an exemplar gating strategy from Donor 1 unstimulated PBMC (IK14004 1.25 μM). Cells gated to remove debris, doublet cell exclusion, and CD3-CD56+<sup>dim</sup> NK cells selected for analysis of IL-12Rβ1 and IL-12Rβ2.



**Figure S14:** Refers to manuscript **Figure 6f**  
 Intracellular IL-2 (Unstimulated human PBMC cultures)

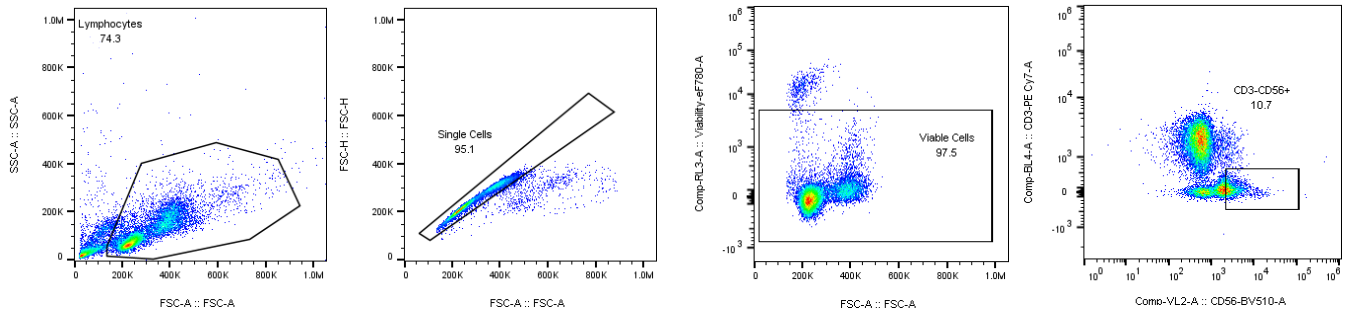

**6f - CD3-CD56+<sup>dim</sup> / IL-2**

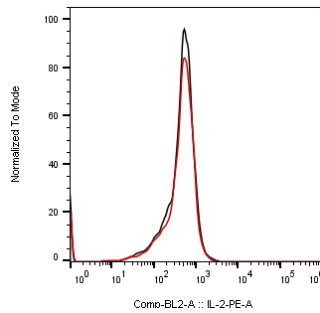

Black = vehicle  
 Red = IK14004 1.25 μM

The Figure shows an exemplar gating strategy from Donor 3 unstimulated PBMC (IK14004 1.25 μM). Cells gated to remove debris, doublet cell exclusion, viable cells gated and CD3-CD56+<sup>dim</sup> NK cells selected for analysis of intracellular IL-2.

**Figure S15:** Refers to manuscript **Figure 6g and 6h**  
**Viability and Intracellular IL-2 (Isolated CD3-CD56<sup>dim</sup> NK cells)**

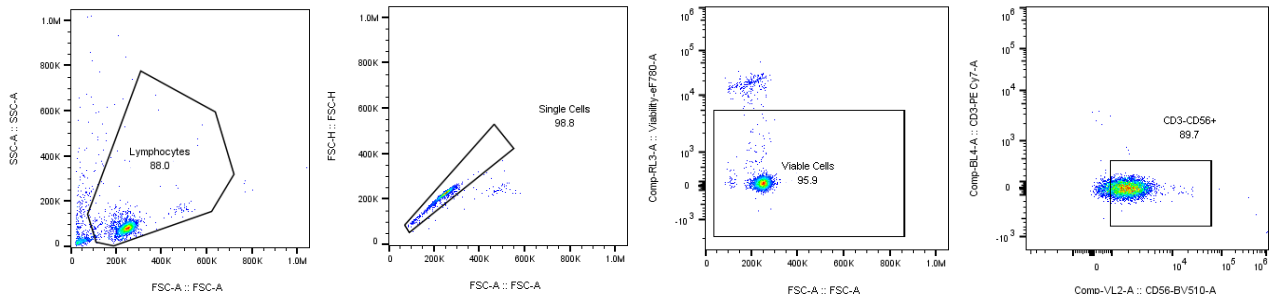

**6g - CD3-CD56<sup>dim</sup> / Viability**

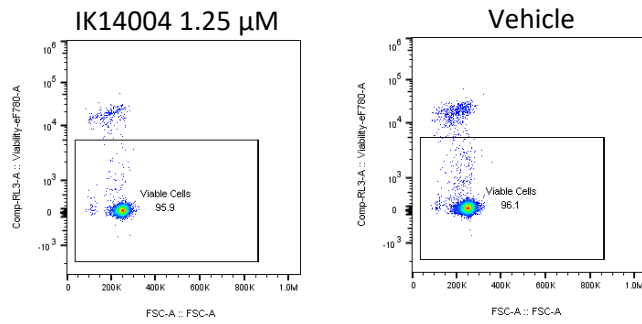

**6h - CD3-CD56<sup>dim</sup> / Intracellular IL-2**

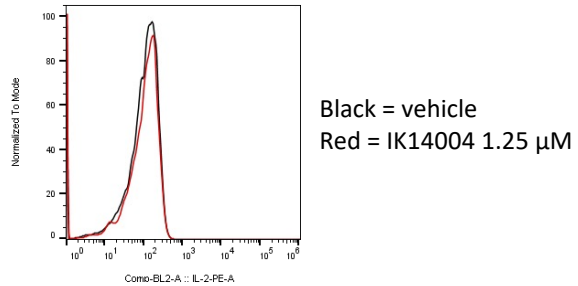

The Figure shows an exemplar gating strategy from Donor 1 unstimulated NK cells (IK14004 1.25  $\mu$ M). Cells gated to remove debris, doublet cell exclusion, viable cells gated and CD3-CD56<sup>dim</sup> NK cells selected for analysis of intracellular IL-2.

**Figure S16:** Refers to manuscript **Figure 6i and 6j**  
**CD25 and IL-12Rβ2 (Isolated CD3-CD56<sup>dim</sup> NK cells)**

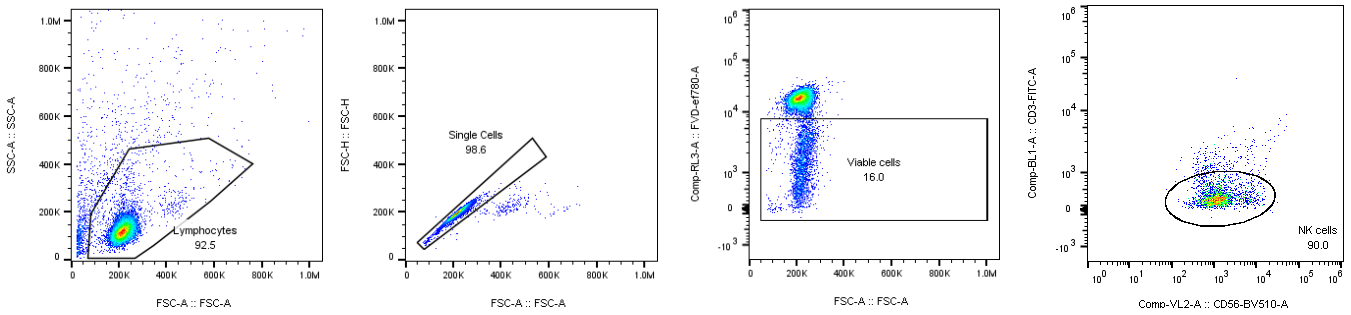

**6i - CD3-CD56<sup>dim</sup> / CD25**

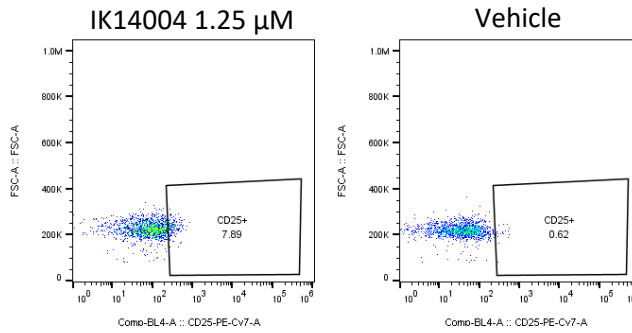

**6j - CD3-CD56<sup>dim</sup> / IL-12Rβ2**

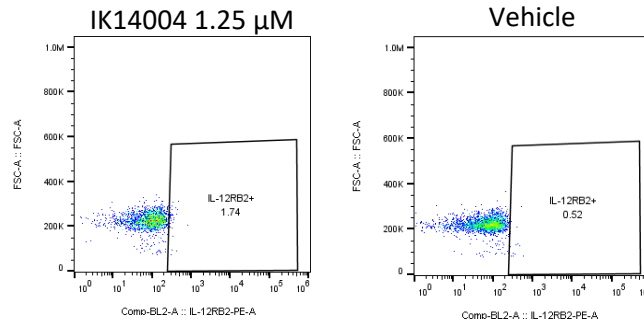

The Figure shows an exemplar gating strategy from Donor 4 unstimulated NK cells (IK14004 1.25 μM). Cells gated to remove debris, doublet cell exclusion, viable cells gated and CD3-CD56<sup>dim</sup> NK cells selected for analysis of CD25 and IL-12Rβ2.

**Figure S17:** Refers to manuscript **Figure 6n - 6p**  
 NKG2D and NKp44 (Isolated CD3-CD56<sup>dim</sup> NK cells)

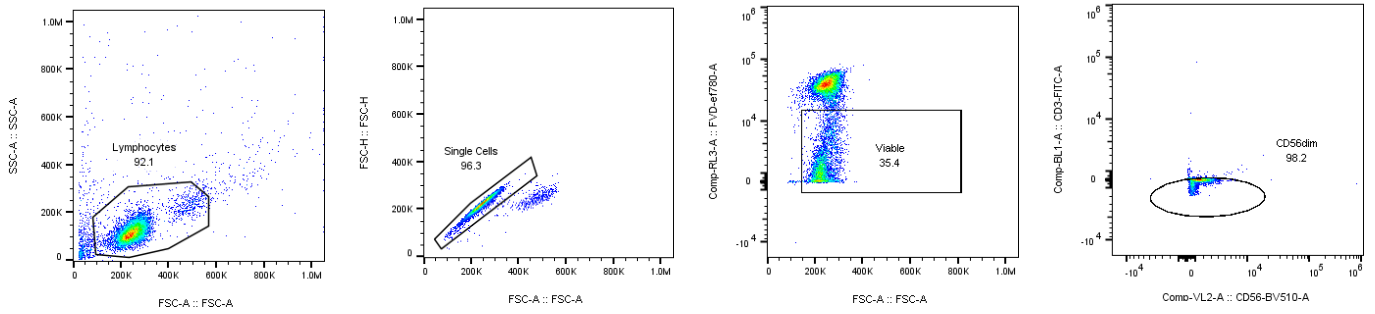

**6n - CD3-CD56<sup>dim</sup> / NKG2D**

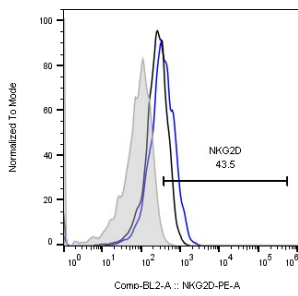

Grey = isotype  
 Black = vehicle  
 Blue = rIL-2

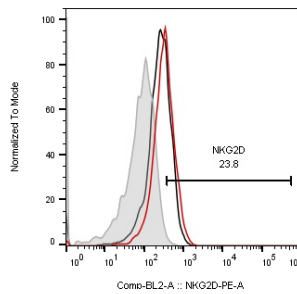

Grey = isotype  
 Black = vehicle  
 Red = IK14004 1.25 μM

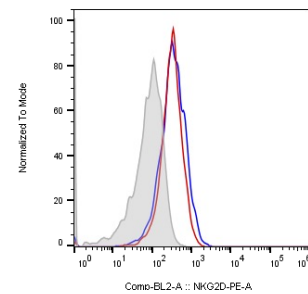

Grey = isotype  
 Blue = rIL-2  
 Red = IK14004 1.25 μM

**6o - CD3-CD56<sup>dim</sup> / NKp44**

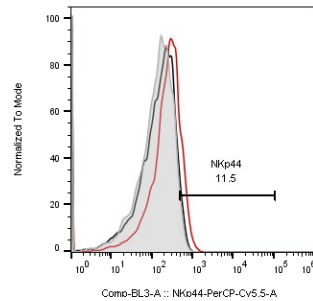

Grey = isotype  
 Black = vehicle  
 Red = IK14004 1.25 μM

**6p - CD3-CD56<sup>dim</sup> / NKp44**

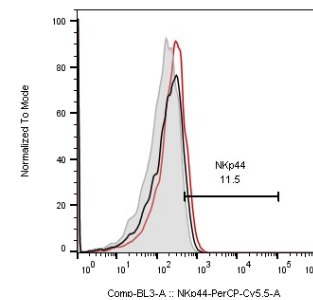

Grey = isotype  
 Black = rIL-2  
 Red = IK14004 1.25 μM

The Figure shows an exemplar gating strategy from Donor 3 unstimulated NK cells (IK14004 1.25 μM). Cells gated to remove debris, doublet cell exclusion, viable cells gated and CD3-CD56<sup>dim</sup> NK cells selected for analysis of NKG2D and NKp44.
